# Supplementary material for: Colloidal Ni1−xCoxO nanostructures as anodic buffer layers in hybrid polypyrrole/Zn1−yInyO p–n junctions
Source: Royal Society of Chemistry journal article supplement (doi:10.1039/c3ce40868j), 2013-01-01
Supplement: c3ce40868j.pdf [file c3ce40868j.pdf]

### SUPPLEMENTARY INFORMATION:

#### **Experiment:**

**Preparation of  $Zn_{1-x}In_xO$  nanosheets:** A homogeneous precursor solution made up of zinc acetate and Indium acetate (weight ratios of 90:10) was obtained using deionized water as the solvent. The prepared sol was subjected to a controlled precipitation reaction, by adding 6 g of KOH in drops, until it was ensured that the precipitation ceased. The entire reactions were carried out at  $\approx 90^\circ\text{C}$ . The obtained sols were then subjected to sonication for a period of 60 min, to accelerate the pyrolytic reactions of H and OH radicals. The resulting products were then aged for another 24 h before their harvest through washing with deionized water and ethanol to remove the possible ionic impurities. The final products were dried at room temperature for 24 h and calcined at  $450^\circ\text{C}$  for 2 h, before further studies.

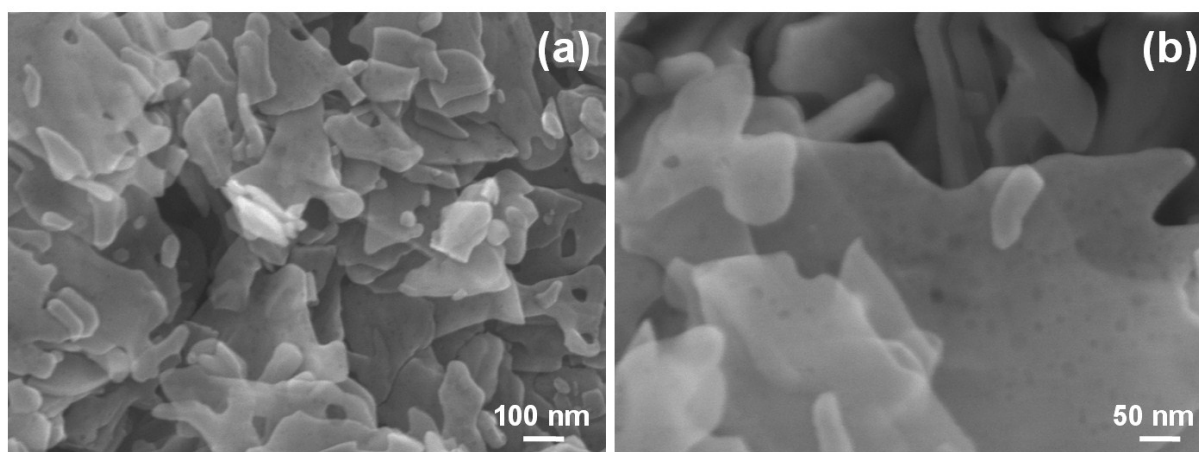

**Figure S1:** Morphological distribution of the  $Zn_{1-x}In_xO$  nanostructures observed using SEM.

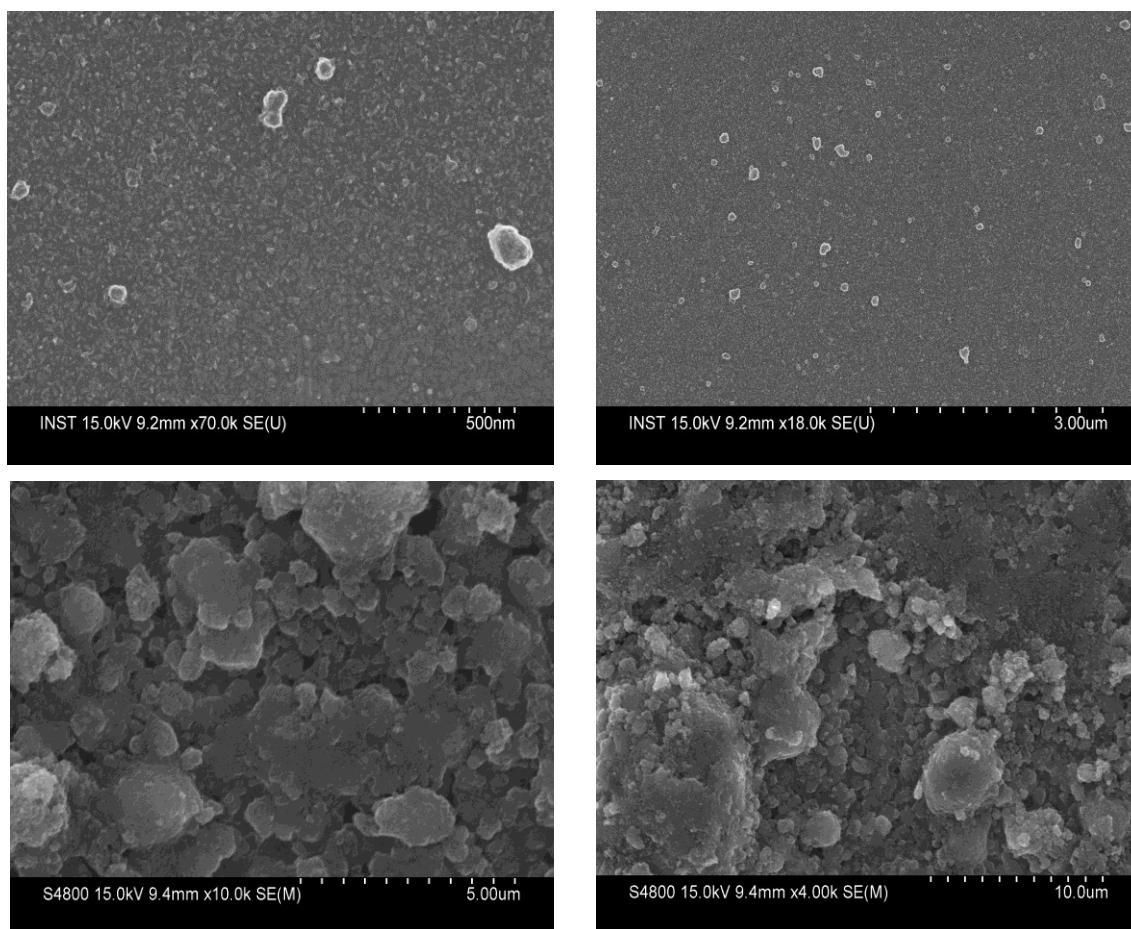

**Figure S2:** Morphological evolution of the PPy deposits on sapphire substrates.

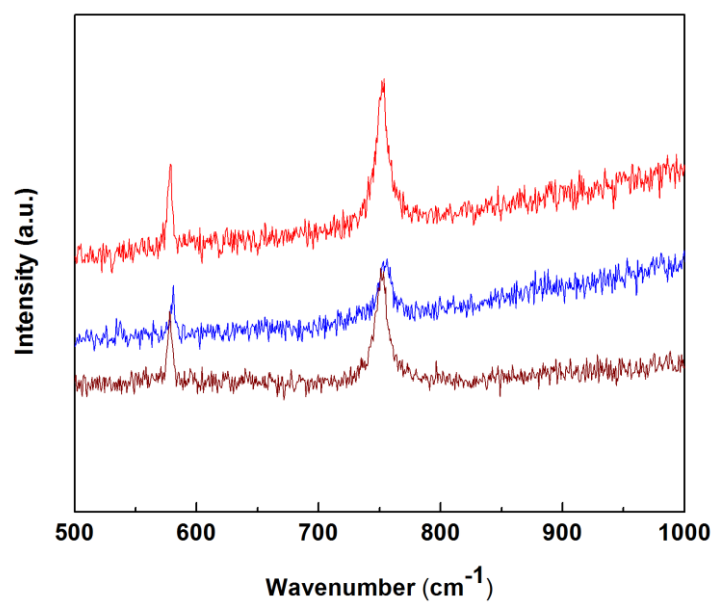

**Figure S3:** Room-temperature Raman spectra of the hybrid heterostructures, revealing the substrate effects at 578 and 752 cm<sup>-1</sup>, respectively.

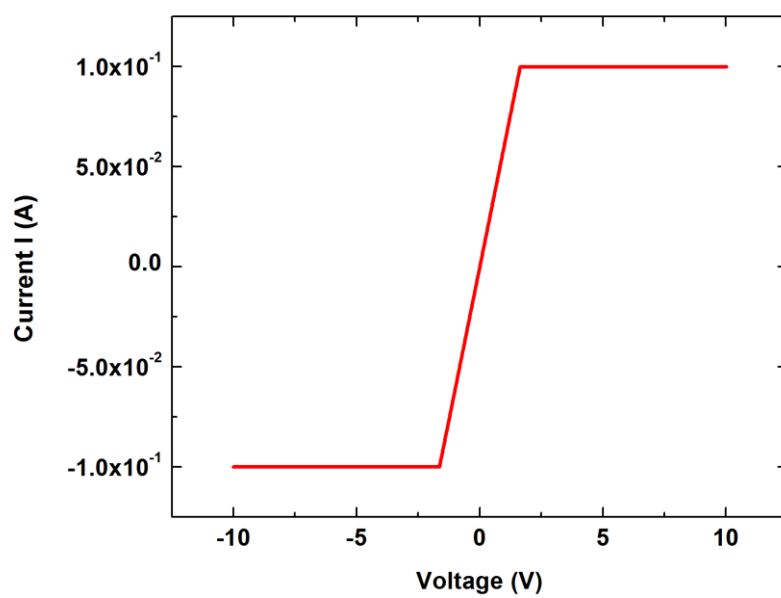

**Figure S4:** I-V characteristics revealing the ohmic behaviour of Ni<sub>1-x</sub>Co<sub>x</sub>O nanostructures deposited on PPy.
